# Supplementary material for: Efficacy and Mechanisms of Action of Essential Oils’ Vapours against Blue Mould on Apples Caused by Penicillium expansum
Source: MDPI journal article supplement (doi:10.3390/ijms24032900), 2023-02-02
Supplement: s1 [file s1]

# Supplementary Materials

## Efficacy and mechanisms of action of essential oils' vapours against blue mould on apples caused by *Penicillium expansum*

Fabio Buonsenso <sup>a,b</sup>, Giada Schiavon <sup>a,b</sup> and Davide Spadaro <sup>a,b,\*</sup>

<sup>a</sup> Department of Agricultural, Forestry and Food Sciences (DISAFA), University of Turin, Largo Paolo Braccini 2, 10095 Grugliasco (Italy)

<sup>b</sup> Centre of Competence for the Innovation in the Agro-environmental Sector - AGROINNOVA, University of Turin, Largo Paolo Braccini 2, 10095 Grugliasco (Italy)

\*Corresponding author; email address: [davide.spadaro@unito.it](mailto:davide.spadaro@unito.it)

**Table S1.** Percentage composition of EOs and retention times (r.t.) of the single molecules.

| Compound               | r.t. (min) | Basil | Oregano | Savoury | Thyme | Lemon | Fennel |
|------------------------|------------|-------|---------|---------|-------|-------|--------|
|                        |            | %     | %       | %       | %     | %     | %      |
| Unknown                | 5.25       | -     | -       | -       | 0.08  | -     | -      |
| $\alpha$ -Thujene      | 5.35       | 0.04  | 1.37    | 1.03    | 0.85  | 0.46  | 0.08   |
| $\alpha$ -Pinene       | 5.54       | 0.42  | 1.09    | 1.63    | 1.22  | 2.13  | 14.41  |
| Camphene               | 6.01       | 0.08  | 0.14    | 0.36    | 1.40  | 0.08  | 0.27   |
| Sabinene               | 6.75       | 0.47  | -       | -       | -     | 2.15  | 0.27   |
| $\beta$ -Pinene        | 6.89       | 0.88  | 0.62    | 1.12    | 0.61  | 13.09 | 1.17   |
| 3-Octanone             | 7.15       | -     | 0.24    | 0.17    | 0.14  | -     | -      |
| $\beta$ -Mircene       | 7.31       | 0.81  | 2.07    | 1.66    | 1.70  | 1.61  | 1.21   |
| Unknown                | 7.47       | -     | -       | 0.07    | 0.07  | -     | -      |
| $\alpha$ -Phellandrene | 7.87       | -     | 0.28    | 0.25    | 0.24  | -     | 6.28   |
| 4-Carene               | 8.11       | -     | 0.08    | 0.12    | 0.11  | -     | -      |
| Terpinolene            | 8.36       | 0.10  | 1.57    | 1.36    | 1.48  | 0.09  | -      |
| p-Cymene               | 8.65       | 0.23  | 8.04    | 18.17   | 18.95 | 1.44  | 1.53   |
| Limonene               | 8.83       | 0.63  | 0.63    | 0.99    | 0.88  | 66.92 | 2.72   |
| Eucalyptol             | 8.94       | 9.67  | 0.14    | 0.16    | 0.11  | 0.13  | 0.11   |
| Unknown                | 9.20       | -     | -       | 0.16    | -     | -     | 0.22   |
| $\alpha$ -Fenchene     | 9.66       | 0.31  | 0.11    | 0.12    | -     | 0.12  | -      |
| $\gamma$ -Terpinene    | 10.20      | 0.06  | 7.37    | 14.61   | 9.91  | 8.84  | 0.69   |
| 3-Carene               | 10.57      | 0.16  | 0.39    | 0.32    | 0.31  | -     | 0.07   |
| Fenchone               | 11.53      | 0.13  | 0.14    | 0.18    | 0.33  | 0.30  | 16.96  |
| Linalool               | 12.23      | 58.28 | 2.24    | 1.75    | 5.73  | 0.15  | 0.16   |
| Unknown                | 12.51      | -     | -       | -       | 0.23  | -     | -      |
| Camphor                | 14.51      | 0.82  | 0.02    | 0.11    | 1.00  | -     | 0.33   |
| Borneol                | 15.79      | 0.43  | 0.14    | 1.55    | 2.37  | -     | -      |
| Terpinen-4-ol          | 16.41      | 0.70  | 0.76    | 0.69    | 1.79  | -     | -      |

|                              |               |      |       |       |       |      |       |
|------------------------------|---------------|------|-------|-------|-------|------|-------|
| $\alpha$ -Terpineol          | 17.20         | 1.10 | 0.01  | 0.17  | 0.38  | 0.14 | -     |
| p-Allylanisole (Estragole)   | 17.58         | 0.94 | 0.01  | 0.04  | -     | -    | 1.84  |
| Umbellulol                   | 17.81         | -    | -     | -     | -     | -    | 0.21  |
| Octyl formate                | 18.56         | 0.32 | -     | -     | -     | -    | -     |
| Citral                       | 20.28 + 22.13 | -    | -     | -     | -     | 1.57 | -     |
| O-Methylthymol               | 20.45         | -    | -     | 2.95  | 0.30  | -    | -     |
| p-Anisaldehyde               | 20.93         | -    | -     | -     | -     | -    | 0.80  |
| Unknown                      | 21.20         | -    | -     | 0.10  | -     | -    | -     |
| trans-Anethole               | 23.01         | 1.16 | -     | -     | -     | -    | 50.45 |
| Thymol                       | 23.61         | -    | 1.98  | 4.12  | 43.26 | -    | -     |
| Carvacrol                    | 24.31         | -    | 68.00 | 41.45 | 4.43  | -    | -     |
| Isothujol                    | 24.86         | -    | -     | -     | -     | -    | 0.24  |
| Santolina triene             | 26.22         | 0.36 | -     | -     | -     | -    | -     |
| Limonene epoxide             | 26.58         | 0.13 | -     | -     | -     | -    | -     |
| Germacrene A                 | 27.01         | 0.10 | -     | -     | -     | -    | -     |
| Eugenol                      | 27.50         | 2.42 | -     | -     | -     | -    | -     |
| $\alpha$ -Cubebene           | 28.64         | 0.19 | -     | -     | -     | 0.40 | -     |
| $\alpha$ -Bourbonene         | 29.17         | 0.53 | -     | -     | -     | -    | -     |
| $\beta$ -Elemene             | 29.68         | 3.28 | -     | -     | -     | -    | -     |
| $\beta$ -Caryophyllene       | 31.36         | 0.85 | 2.05  | 4.00  | 2.11  | -    | -     |
| trans- $\alpha$ -Bergamotene | 32.44         | 5.75 | -     | -     | -     | -    | -     |
| $\alpha$ -Guaiene            | 32.56         | 0.57 | -     | -     | -     | -    | -     |
| $\beta$ -Ocimene             | 33.40         | 1.16 | 0.27  | 0.07  | -     | -    | -     |
| Germacrene D                 | 35.11         | 1.01 | -     | -     | -     | -    | -     |
| Aromandrene                  | 35.41         | 0.46 | -     | -     | -     | -    | -     |
| Cis- $\alpha$ -Bisabolene    | 36.10         | 0.77 | -     | -     | -     | -    | -     |
| $\alpha$ -Bulsene            | 36.68         | 1.05 | -     | -     | -     | -    | -     |
| Unknown                      | 37.01         | -    | 0.22  | 0.43  | -     | -    | -     |
| $\alpha$ -Farnesene          | 37.15         | 2.15 | -     | -     | -     | 0.37 | -     |
| Unknown                      | 40.26         | 0.27 | -     | -     | -     | -    | -     |
| Unknown                      | 41.24         | -    | 0.04  | 0.08  | -     | -    | -     |
| Cedrene                      | 43.11         | 0.30 | -     | -     | -     | -    | -     |
| Sativene                     | 44.71         | 0.94 | -     | -     | -     | -    | -     |

**Table S2:** Volatile organic compounds in the control cabinets at 1, 10, 28, 43 and 50 days of storage.

| Control                                                           |                      | Temperature: 1±1 °C |       |       |       |       |       |       |       | 15±1 °C |       |
|-------------------------------------------------------------------|----------------------|---------------------|-------|-------|-------|-------|-------|-------|-------|---------|-------|
| Compound                                                          | Retention time (min) | t1                  |       | t10   |       | t28   |       | t43   |       | t50     |       |
|                                                                   |                      | %                   | ppm   | %     | ppm   | %     | ppm   | %     | ppm   | %       | ppm   |
| Hexyl acetate                                                     | 8.10                 | 23.40               | 6.85  | 46.03 | 23.24 | 46.33 | 23.69 | 49.17 | 34.77 | 17.41   | 27.35 |
| Hexyl butyrate                                                    | 17.30                | 13.00               | 3.81  | 13.71 | 6.92  | 15.69 | 8.02  | 17.01 | 12.03 | 16.32   | 25.64 |
| Hexyl 2-methylbutanoate                                           | 20.20                | 13.30               | 3.90  | 9.74  | 4.92  | 10.17 | 5.20  | 10.38 | 7.34  | 12.65   | 19.88 |
| Hexyl hexanoate                                                   | 29.50                | 9.77                | 2.86  | 8.56  | 4.32  | 6.60  | 3.38  | 6.50  | 4.60  | 12.06   | 18.94 |
| α-Farnesene                                                       | 37.15                | 39.44               | 11.55 | 20.66 | 10.43 | 17.04 | 8.71  | 16.05 | 11.35 | 37.25   | 58.52 |
| 2,2,4-Trimethyl-3-(carboxyisopropyl)pentanoic acid isobutyl ester | 42.64                | 0.00                | 0.00  | 0.00  | 0.00  | 0.00  | 0.00  | 0.00  | 0.00  | 4.10    | 6.44  |
| 2,6,10,14-tetramethyl pentadecane                                 | 44.50                | 1.09                | 0.32  | 1.30  | 0.66  | 4.18  | 2.14  | 0.89  | 0.63  | 0.22    | 0.34  |
| 4-sec-Butyl-2,6-di-tert-butylphenol                               | 44.78                | 0.00                | 0.00  | 0.00  | 0.00  | 0.00  | 0.00  | 0.00  | 0.00  | 0.00    | 0.00  |

**Table S3:** Volatile organic compounds in the cabinets of inoculated control fruit at 1, 10, 28, 43 and 50 days of storage.

| Inoculated control      |                      | Temperature: 1±1 °C |      |       |       |       |       |       |       | 15±1 °C |       |
|-------------------------|----------------------|---------------------|------|-------|-------|-------|-------|-------|-------|---------|-------|
| Compound                | Retention time (min) | t1                  |      | t10   |       | t28   |       | t43   |       | t50     |       |
|                         |                      | %                   | ppm  | %     | ppm   | %     | ppm   | %     | ppm   | %       | ppm   |
| Hexyl acetate           | 8.10                 | 22.81               | 7.23 | 34.41 | 27.71 | 40.29 | 34.29 | 56.13 | 46.65 | 23.71   | 29.81 |
| Hexyl butyrate          | 17.30                | 12.21               | 3.87 | 9.97  | 8.03  | 12.55 | 10.68 | 9.99  | 8.31  | 11.89   | 14.95 |
| Hexyl 2-methylbutanoate | 20.20                | 16.48               | 5.22 | 11.06 | 8.90  | 12.16 | 10.35 | 8.95  | 7.44  | 17.63   | 22.17 |
| Hexyl hexanoate         | 29.50                | 8.59                | 2.72 | 6.59  | 5.31  | 7.52  | 6.40  | 5.53  | 4.60  | 10.27   | 12.91 |
| α-Farnesene             | 37.15                | 18.69               | 5.92 | 13.63 | 10.98 | 15.48 | 13.17 | 10.03 | 8.33  | 31.01   | 38.99 |

|                                                                   |       |       |      |       |       |      |      |      |      |      |      |
|-------------------------------------------------------------------|-------|-------|------|-------|-------|------|------|------|------|------|------|
| 2,2,4-Trimethyl-3-(carboxyisopropyl)pentanoic acid isobutyl ester | 42.64 | 18.29 | 5.79 | 21.52 | 17.33 | 9.52 | 8.10 | 2.66 | 2.21 | 5.04 | 6.33 |
| 2,6,10,14-tetramethylpentadecane                                  | 44.50 | 0.75  | 0.24 | 1.03  | 0.83  | 0.77 | 0.66 | 6.69 | 5.56 | 0.45 | 0.57 |
| 4-sec-Butyl-2,6-di-tert-butylphenol                               | 44.78 | 2.17  | 0.69 | 1.79  | 1.44  | 1.72 | 1.46 | 0.02 | 0.02 | 0.00 | 0.00 |

**Table S4:** Basil essential oil composition and volatile organic compounds in the cabinets of fruit treated with basil essential oil at 1.0 % at 1, 10, 28, 43 and 50 days of storage.

| Basil EO 1.0 % |       |                      | Temperature: 1±1 °C |       |       |       |       |      |       |       | 15±1 °C |       |
|----------------|-------|----------------------|---------------------|-------|-------|-------|-------|------|-------|-------|---------|-------|
| Compound       | %     | Retention time (min) | t1                  |       | t10   |       | t28   |      | t43   |       | t50     |       |
|                |       |                      | %                   | ppm   | %     | ppm   | %     | ppm  | %     | ppm   | %       | ppm   |
| α-Thujene      | 0.04  | 5.35                 | 0.00                | 0.00  | 0.05  | 0.03  | 0.00  | 0.00 | 0.00  | 0.00  | 0.00    | 0.00  |
| α-Pinene       | 0.42  | 5.54                 | 0.00                | 0.00  | 0.00  | 0.00  | 0.00  | 0.00 | 0.00  | 0.00  | 0.00    | 0.00  |
| Camphene       | 0.08  | 6.01                 | 0.00                | 0.00  | 0.00  | 0.00  | 0.00  | 0.00 | 0.00  | 0.00  | 0.00    | 0.00  |
| Sabinene       | 0.47  | 6.75                 | 0.00                | 0.00  | 0.00  | 0.00  | 0.00  | 0.00 | 0.00  | 0.00  | 0.00    | 0.00  |
| β-Pinene       | 0.88  | 6.89                 | 0.00                | 0.00  | 0.00  | 0.00  | 0.00  | 0.00 | 0.00  | 0.00  | 0.00    | 0.00  |
| β-Mircene      | 0.81  | 7.31                 | 0.00                | 0.00  | 1.21  | 0.81  | 0.88  | 0.43 | 1.40  | 0.61  | 0.75    | 0.45  |
| Hexyl acetate  | -     | 8.10                 | 3.45                | 2.58  | 16.58 | 11.11 | 13.72 | 6.76 | 22.52 | 9.87  | 4.09    | 2.46  |
| Terpinolene    | 0.10  | 8.36                 | 0.00                | 0.00  | 0.00  | 0.00  | 0.00  | 0.00 | 0.00  | 0.00  | 0.00    | 0.00  |
| p-Cymene       | 0.23  | 8.65                 | 1.13                | 1.97  | 2.84  | 4.44  | 0.86  | 0.99 | 1.69  | 1.72  | 0.67    | 0.95  |
| Limonene       | 0.63  | 8.83                 | 0.00                | 0.00  | 0.00  | 0.00  | 0.00  | 0.00 | 0.00  | 0.00  | 0.00    | 0.00  |
| Eucalyptol     | 9.67  | 8.94                 | 0.96                | 0.72  | 1.40  | 0.94  | 0.86  | 0.42 | 1.68  | 0.74  | 0.67    | 0.40  |
| α-Fenchene     | 0.31  | 9.66                 | 0.00                | 0.00  | 0.00  | 0.00  | 0.00  | 0.00 | 0.00  | 0.00  | 0.00    | 0.00  |
| γ-Terpinene    | 0.06  | 10.20                | 0.10                | 0.08  | 0.18  | 0.12  | 0.00  | 0.00 | 0.00  | 0.00  | 0.13    | 0.08  |
| 3-Carene       | 0.16  | 10.57                | 0.23                | 0.17  | 0.30  | 0.20  | 0.47  | 0.23 | 0.18  | 0.08  | 0.72    | 0.43  |
| Fenchone       | 0.13  | 11.53                | 0.30                | 0.22  | 0.15  | 0.10  | 0.27  | 0.13 | 0.13  | 0.06  | 0.56    | 0.34  |
| Linalool       | 58.28 | 12.23                | 57.52               | 42.97 | 32.01 | 21.45 | 19.72 | 9.71 | 24.98 | 10.95 | 18.74   | 11.30 |

|                                                                   |      |       |      |      |       |      |       |      |       |      |       |       |
|-------------------------------------------------------------------|------|-------|------|------|-------|------|-------|------|-------|------|-------|-------|
| Camphor                                                           | 0.82 | 14.51 | 0.51 | 0.38 | 0.56  | 0.38 | 0.05  | 0.03 | 0.00  | 0.00 | 0.34  | 0.20  |
| Borneol                                                           | 0.43 | 15.79 | 0.51 | 0.38 | 0.62  | 0.41 | 0.12  | 0.06 | 0.00  | 0.00 | 0.47  | 0.28  |
| Terpinen-4-ol                                                     | 0.70 | 16.41 | 1.25 | 0.94 | 0.76  | 0.51 | 0.33  | 0.16 | 0.01  | 0.01 | 0.62  | 0.37  |
| $\alpha$ -Terpineol                                               | 1.10 | 17.20 | 4.50 | 3.36 | 4.72  | 3.16 | 4.45  | 2.19 | 6.01  | 2.63 | 0.28  | 0.17  |
| Hexyl butyrate                                                    | -    | 17.30 | 4.48 | 3.35 | 4.72  | 3.16 | 4.45  | 2.19 | 6.01  | 2.63 | 6.31  | 3.80  |
| p-Allylanisole (Estragole)                                        | 0.94 | 17.58 | 1.65 | 1.24 | 0.98  | 0.66 | 0.54  | 0.27 | 1.29  | 0.56 | 1.55  | 0.93  |
| Octyl formate                                                     | 0.32 | 18.56 | 0.45 | 0.34 | 0.02  | 0.02 | 0.25  | 0.12 | 0.10  | 0.04 | 0.12  | 0.07  |
| Hexyl 2-methylbutanoate                                           | -    | 20.20 | 2.56 | 1.92 | 4.56  | 3.06 | 4.66  | 2.29 | 6.41  | 2.81 | 12.17 | 7.34  |
| t-Anethole                                                        | 1.16 | 23.01 | 0.50 | 0.99 | 0.44  | 0.78 | 0.48  | 0.64 | 0.70  | 0.82 | 0.84  | 1.36  |
| Santolina triene                                                  | 0.36 | 26.22 | 0.17 | 0.13 | 0.02  | 0.01 | 0.08  | 0.04 | 0.33  | 0.15 | 0.25  | 0.15  |
| Limonene epoxide                                                  | 0.13 | 26.58 | 0.30 | 0.22 | 0.37  | 0.25 | 0.00  | 0.00 | 0.11  | 0.05 | 0.00  | 0.00  |
| Germacrene A                                                      | 0.10 | 27.01 | 0.15 | 0.11 | 0.03  | 0.02 | 0.00  | 0.00 | 0.13  | 0.06 | 0.00  | 0.00  |
| Eugenol                                                           | 2.42 | 27.50 | 1.69 | 1.26 | 3.37  | 2.26 | 4.24  | 2.09 | 0.78  | 0.34 | 1.12  | 0.68  |
| $\alpha$ -Cubebene                                                | 0.19 | 28.64 | 0.13 | 0.10 | 4.72  | 3.16 | 3.23  | 1.59 | 0.43  | 0.19 | 0.00  | 0.00  |
| $\alpha$ -Bourbonene                                              | 0.53 | 29.17 | 0.29 | 0.22 | 0.82  | 0.55 | 0.76  | 0.37 | 0.10  | 0.04 | 0.00  | 0.00  |
| Hexyl hexanoate                                                   | -    | 29.50 | 1.45 | 1.09 | 2.69  | 1.80 | 2.84  | 1.40 | 2.89  | 1.26 | 5.62  | 3.39  |
| $\beta$ -Elemene                                                  | 3.28 | 29.68 | 1.05 | 0.79 | 0.73  | 0.49 | 0.84  | 0.41 | 0.69  | 0.30 | 1.60  | 0.97  |
| $\beta$ -Caryophyllene                                            | 0.85 | 31.36 | 0.34 | 0.25 | 0.32  | 0.22 | 0.34  | 0.17 | 0.39  | 0.17 | 0.86  | 0.52  |
| trans- $\alpha$ -Bergamotene                                      | 5.75 | 32.44 | 1.60 | 1.19 | 0.94  | 0.63 | 2.01  | 0.99 | 1.00  | 0.44 | 2.24  | 1.35  |
| $\alpha$ -Guaiene                                                 | 0.57 | 32.56 | 0.00 | 0.00 | 0.07  | 0.05 | 2.54  | 1.25 | 0.00  | 0.00 | 0.00  | 0.00  |
| $\beta$ -Ocimene                                                  | 1.16 | 33.40 | 0.44 | 0.33 | 0.15  | 0.10 | 0.22  | 0.11 | 0.24  | 0.11 | 0.43  | 0.26  |
| Germacrene D                                                      | 1.01 | 35.11 | 0.17 | 0.13 | 0.14  | 0.09 | 2.72  | 1.34 | 0.24  | 0.10 | 0.11  | 0.07  |
| Aromandrene                                                       | 0.46 | 35.41 | 0.34 | 0.26 | 0.23  | 0.16 | 0.12  | 0.06 | 0.17  | 0.07 | 0.15  | 0.09  |
| Cis- $\alpha$ -Bisabolene                                         | 0.77 | 36.10 | 0.39 | 0.29 | 0.57  | 0.38 | 0.56  | 0.28 | 0.10  | 0.04 | 0.21  | 0.13  |
| $\alpha$ -Bulsene                                                 | 1.05 | 36.68 | 0.35 | 0.26 | 0.35  | 0.23 | 0.29  | 0.14 | 0.09  | 0.04 | 0.12  | 0.07  |
| $\alpha$ -Farnesene                                               | 2.15 | 37.15 | 6.37 | 4.76 | 10.43 | 6.99 | 11.70 | 5.76 | 12.09 | 5.30 | 37.06 | 22.35 |
| Unknown                                                           | 0.27 | 40.26 | 0.32 | 0.24 | 0.12  | 0.08 | 0.00  | 0.00 | 0.31  | 0.14 | 0.00  | 0.00  |
| Cedrene                                                           | 0.30 | 43.11 | 3.78 | 2.83 | 0.05  | 0.03 | 3.77  | 1.86 | 0.17  | 0.07 | 0.00  | 0.00  |
| 2,2,4-Trimethyl-3-(carboxyisopropyl)pentanoic acid isobutyl ester | -    | 42.64 | 0.20 | 0.15 | 0.93  | 0.62 | 9.37  | 4.61 | 5.70  | 2.50 | 0.95  | 0.57  |
| 2,6,10,14-tetramethylpentadecane                                  | -    | 44.50 | 0.00 | 0.00 | 0.00  | 0.00 | 0.00  | 0.00 | 0.00  | 0.00 | 0.00  | 0.00  |

|                                     |      |       |      |      |      |      |      |      |      |      |      |      |
|-------------------------------------|------|-------|------|------|------|------|------|------|------|------|------|------|
| Sativene                            | 0.94 | 44.71 | 0.25 | 0.19 | 0.48 | 0.32 | 1.34 | 0.66 | 0.47 | 0.21 | 0.11 | 0.07 |
| 4-sec-Butyl-2,6-di-tert-butylphenol | -    | 44.78 | 0.11 | 0.08 | 0.39 | 0.26 | 0.92 | 0.45 | 0.45 | 0.20 | 0.10 | 0.06 |

**Table S5:** Oregano essential oil composition and volatile organic compounds in the cabinets of fruit treated with oregano essential oil at 1.0 % at 1, 10, 28, 43 and 50 days of storage.

| Oregano EO 1.0 % |      |                      | Temperature: 1±1 °C |       |       |       |       |       |       |       | 15±1 °C |       |
|------------------|------|----------------------|---------------------|-------|-------|-------|-------|-------|-------|-------|---------|-------|
| Compound         | %    | Retention time (min) | t1                  |       | t10   |       | t28   |       | t43   |       | t50     |       |
|                  |      |                      | %                   | ppm   | %     | ppm   | %     | ppm   | %     | ppm   | %       | ppm   |
| α-Thujene        | 1.37 | 5.35                 | 0.00                | 0.00  | 0.00  | 0.00  | 0.00  | 0.00  | 0.00  | 0.00  | 0.00    | 0.00  |
| α-Pinene         | 1.09 | 5.54                 | 0.00                | 0.00  | 0.00  | 0.00  | 0.00  | 0.00  | 0.00  | 0.00  | 0.00    | 0.00  |
| Camphene         | 0.14 | 6.01                 | 0.00                | 0.00  | 0.00  | 0.00  | 0.00  | 0.00  | 0.00  | 0.00  | 0.00    | 0.00  |
| β-Pinene         | 0.62 | 6.89                 | 0.36                | 0.76  | 0.00  | 0.00  | 0.33  | 0.63  | 0.39  | 0.62  | 0.20    | 0.52  |
| 3-Octanone       | 0.24 | 7.15                 | 0.00                | 0.00  | 0.00  | 0.00  | 0.00  | 0.00  | 0.00  | 0.00  | 0.19    | 0.50  |
| β-Mircene        | 2.07 | 7.31                 | 0.84                | 1.78  | 1.66  | 3.14  | 1.61  | 3.06  | 2.51  | 3.95  | 1.57    | 4.09  |
| α-Phellandrene   | 0.28 | 7.87                 | 0.00                | 0.00  | 0.00  | 0.00  | 0.00  | 0.00  | 0.00  | 0.00  | 0.00    | 0.00  |
| Hexyl acetate    | -    | 8.10                 | 6.68                | 14.11 | 19.06 | 36.12 | 18.78 | 35.67 | 29.69 | 46.67 | 11.01   | 28.74 |
| 4-Carene         | 0.08 | 8.11                 | 0.00                | 0.00  | 0.00  | 0.00  | 0.00  | 0.00  | 0.00  | 0.00  | 0.00    | 0.00  |
| Terpinolene      | 1.57 | 8.36                 | 1.30                | 2.75  | 2.47  | 4.69  | 2.17  | 4.12  | 4.14  | 6.50  | 0.94    | 2.46  |
| p-Cymene         | 8.04 | 8.65                 | 1.25                | 1.84  | 1.46  | 1.94  | 1.30  | 1.72  | 2.41  | 2.65  | 0.81    | 1.48  |
| Limonene         | 0.63 | 8.83                 | 1.01                | 1.06  | 0.85  | 0.80  | 0.90  | 0.86  | 1.38  | 1.08  | 0.36    | 0.47  |
| Eucalyptol       | 0.14 | 8.94                 | 0.00                | 0.00  | 0.00  | 0.00  | 0.00  | 0.00  | 0.00  | 0.00  | 0.00    | 0.00  |
| α-Fenchene       | 0.11 | 9.66                 | 0.00                | 0.00  | 0.00  | 0.00  | 0.00  | 0.00  | 0.00  | 0.00  | 0.00    | 0.00  |
| γ-Terpinene      | 7.37 | 10.20                | 0.00                | 0.00  | 0.00  | 0.00  | 0.00  | 0.00  | 0.00  | 0.00  | 0.00    | 0.00  |
| 3-Carene         | 0.39 | 10.57                | 0.00                | 0.00  | 0.00  | 0.00  | 0.00  | 0.00  | 0.00  | 0.00  | 0.00    | 0.00  |
| Fenchone         | 0.14 | 11.53                | 0.97                | 2.06  | 0.37  | 0.70  | 0.09  | 0.18  | 0.41  | 0.65  | 0.16    | 0.42  |
| Linalool         | 2.24 | 12.23                | 7.92                | 5.02  | 4.10  | 2.33  | 2.86  | 1.63  | 2.81  | 1.33  | 1.82    | 1.38  |
| Camphor          | 0.02 | 14.51                | 0.26                | 0.54  | 0.00  | 0.00  | 0.00  | 0.00  | 0.00  | 0.00  | 0.28    | 0.72  |

|                                                                   |       |       |       |       |       |       |       |       |       |       |       |       |
|-------------------------------------------------------------------|-------|-------|-------|-------|-------|-------|-------|-------|-------|-------|-------|-------|
| Borneol                                                           | 0.14  | 15.79 | 1.05  | 2.22  | 0.38  | 0.70  | 0.69  | 1.31  | 0.32  | 0.51  | 0.33  | 0.87  |
| Terpinen-4-ol                                                     | 0.76  | 16.41 | 3.00  | 6.33  | 1.57  | 2.98  | 0.97  | 1.83  | 0.81  | 1.27  | 0.95  | 2.48  |
| $\alpha$ -Terpineol                                               | 0.01  | 17.20 | 5.49  | 11.60 | 2.02  | 3.84  | 2.10  | 4.00  | 2.49  | 3.91  | 3.46  | 9.03  |
| Hexyl butyrate                                                    | -     | 17.30 | 5.49  | 11.60 | 5.72  | 10.84 | 6.23  | 11.83 | 7.34  | 11.54 | 7.22  | 18.84 |
| p-Allylanisole (Estragole)                                        | 0.01  | 17.58 | 1.76  | 3.72  | 1.76  | 3.34  | 2.10  | 4.00  | 2.49  | 3.91  | 3.46  | 9.03  |
| Hexyl 2-methylbutanoate                                           | -     | 20.20 | 5.30  | 11.19 | 4.61  | 8.73  | 4.73  | 8.98  | 5.68  | 8.93  | 9.01  | 23.51 |
| O-Methylthymol                                                    | -     | 20.45 | 1.78  | 3.75  | 1.74  | 3.30  | 2.45  | 4.65  | 2.85  | 4.48  | 4.26  | 11.11 |
| Thymol                                                            | 1.98  | 23.61 | 2.08  | 1.76  | 1.56  | 1.19  | 1.21  | 0.92  | 0.58  | 0.37  | 0.91  | 0.95  |
| Carvacrol                                                         | 68.00 | 24.31 | 38.55 | 81.41 | 38.44 | 72.86 | 25.08 | 47.64 | 17.94 | 28.20 | 24.85 | 64.87 |
| Hexyl hexanoate                                                   | -     | 29.50 | 4.06  | 8.58  | 3.80  | 7.21  | 4.24  | 8.06  | 4.06  | 6.38  | 8.33  | 21.74 |
| $\beta$ -Caryophyllene                                            | 2.05  | 31.36 | 1.21  | 2.55  | 0.16  | 0.30  | 1.28  | 2.42  | 0.69  | 1.09  | 1.11  | 2.89  |
| $\beta$ -Ocimene                                                  | 0.27  | 33.40 | 0.00  | 0.00  | 0.00  | 0.00  | 0.00  | 0.00  | 0.00  | 0.00  | 0.16  | 0.42  |
| Unknown                                                           | 0.22  | 37.01 | 0.00  | 0.00  | 0.00  | 0.00  | 0.03  | 0.05  | 0.00  | 0.00  | 0.00  | 0.00  |
| $\alpha$ -Farnesene                                               | -     | 37.15 | 9.02  | 19.05 | 6.53  | 12.37 | 5.52  | 10.48 | 5.61  | 8.83  | 16.61 | 43.35 |
| Unknown                                                           | 0.04  | 41.24 | 0.00  | 0.00  | 0.00  | 0.00  | 0.03  | 0.05  | 0.00  | 0.00  | 0.00  | 0.00  |
| 2,2,4-Trimethyl-3-(carboxyisopropyl)pentanoic acid isobutyl ester | -     | 42.64 | 0.14  | 0.29  | 0.61  | 1.15  | 0.90  | 1.70  | 0.00  | 0.00  | 0.00  | 0.00  |
| 2,6,10,14-tetramethyl pentadecane                                 | -     | 44.50 | 0.31  | 0.65  | 0.39  | 0.73  | 12.50 | 23.74 | 5.28  | 8.29  | 2.02  | 5.27  |
| 4-sec-Butyl-2,6-di-tert-butylphenol                               | -     | 44.78 | 0.18  | 0.37  | 0.75  | 1.41  | 1.97  | 3.74  | 0.12  | 0.19  | 0.01  | 0.04  |

**Table S6:** Savoury essential oil composition and volatile organic compounds in the cabinets of fruit treated with savoury essential oil at 1.0 % at 1, 10, 28, 43 and 50 days of storage.

| Savoury EO 1.0 %  |      |                      | Temperature: 1 $\pm$ 1 °C |      |      |      |      |      |      |      | 15 $\pm$ 1 °C |      |
|-------------------|------|----------------------|---------------------------|------|------|------|------|------|------|------|---------------|------|
| Compound          | %    | Retention time (min) | t1                        |      | t10  |      | t28  |      | t43  |      | t50           |      |
|                   |      |                      | %                         | ppm  | %    | ppm  | %    | ppm  | %    | ppm  | %             | ppm  |
| $\alpha$ -Thujene | 1.03 | 5.35                 | 0.00                      | 0.00 | 0.00 | 0.00 | 0.00 | 0.00 | 0.00 | 0.00 | 0.00          | 0.00 |

|                            |       |       |       |       |       |       |       |       |       |       |       |       |
|----------------------------|-------|-------|-------|-------|-------|-------|-------|-------|-------|-------|-------|-------|
| $\alpha$ -Pinene           | 1.63  | 5.54  | 0.00  | 0.00  | 0.00  | 0.00  | 0.00  | 0.00  | 0.00  | 0.00  | 0.00  | 0.00  |
| Camphene                   | 0.36  | 6.01  | 0.00  | 0.00  | 0.00  | 0.00  | 0.00  | 0.00  | 0.00  | 0.00  | 0.00  | 0.00  |
| $\beta$ -Pinene            | 1.12  | 6.89  | 2.10  | 3.28  | 0.39  | 1.33  | 0.77  | 1.52  | 0.38  | 0.59  | 0.16  | 0.42  |
| 3-Octanone                 | 0.17  | 7.15  | 0.36  | 0.56  | 0.21  | 0.72  | 0.42  | 0.83  | 0.26  | 0.41  | 0.39  | 1.03  |
| $\beta$ -Mircene           | 1.66  | 7.31  | 1.02  | 1.59  | 1.32  | 4.50  | 1.84  | 3.66  | 1.59  | 2.47  | 0.85  | 2.21  |
| Unknown                    | 0.07  | 7.47  | 0.38  | 0.59  | 0.00  | 0.00  | 0.00  | 0.00  | 0.00  | 0.00  | 0.00  | 0.00  |
| $\alpha$ -Phellandrene     | 0.25  | 7.87  | 2.71  | 4.25  | 2.51  | 8.56  | 5.39  | 10.71 | 5.23  | 8.12  | 1.50  | 3.94  |
| Hexyl acetate              | -     | 8.10  | 2.77  | 4.34  | 2.21  | 7.53  | 3.03  | 6.01  | 6.30  | 9.79  | 3.44  | 9.01  |
| 4-Carene                   | 0.12  | 8.11  | 0.00  | 0.00  | 0.00  | 0.00  | 0.00  | 0.00  | 0.00  | 0.00  | 0.00  | 0.00  |
| Terpinolene                | 1.36  | 8.36  | 5.35  | 8.39  | 2.38  | 8.14  | 3.17  | 6.30  | 9.82  | 15.26 | 3.30  | 8.62  |
| p-Cymene                   | 18.17 | 8.65  | 17.19 | 18.86 | 10.20 | 24.36 | 18.61 | 25.88 | 18.31 | 19.91 | 8.63  | 15.82 |
| Limonene                   | 0.99  | 8.83  | 0.00  | 0.00  | 0.00  | 0.00  | 0.00  | 0.00  | 0.00  | 0.00  | 0.00  | 0.00  |
| Eucalyptol                 | 0.16  | 8.94  | 0.00  | 0.00  | 0.00  | 0.00  | 0.00  | 0.00  | 0.00  | 0.00  | 0.00  | 0.00  |
| Unknown                    | 0.16  | 9.20  | 0.00  | 0.00  | 0.00  | 0.00  | 0.00  | 0.00  | 0.00  | 0.00  | 0.00  | 0.00  |
| $\alpha$ -Fenchene         | 0.12  | 9.66  | 0.00  | 0.00  | 0.00  | 0.00  | 0.00  | 0.00  | 0.00  | 0.00  | 0.00  | 0.00  |
| $\gamma$ -Terpinene        | 14.61 | 10.20 | 5.96  | 9.34  | 3.89  | 13.28 | 7.94  | 15.76 | 7.61  | 11.82 | 3.71  | 9.70  |
| 3-Carene                   | 0.32  | 10.57 | 1.21  | 1.89  | 1.31  | 4.47  | 1.24  | 2.46  | 0.52  | 0.82  | 0.85  | 2.23  |
| Fenchone                   | 0.18  | 11.53 | 0.00  | 0.00  | 0.10  | 0.35  | 0.13  | 0.26  | 0.00  | 0.00  | 0.00  | 0.00  |
| Linalool                   | 1.75  | 12.23 | 9.92  | 4.67  | 3.60  | 3.69  | 4.83  | 2.88  | 3.11  | 1.45  | 3.43  | 2.70  |
| Camphor                    | 0.11  | 14.51 | 0.51  | 0.80  | 0.00  | 0.00  | 0.23  | 0.45  | 0.47  | 0.72  | 0.44  | 1.16  |
| Borneol                    | 1.55  | 15.79 | 4.23  | 6.63  | 2.18  | 7.43  | 2.87  | 5.70  | 2.87  | 4.45  | 2.82  | 7.38  |
| Terpinen-4-ol              | 0.69  | 16.41 | 2.04  | 3.20  | 0.75  | 2.56  | 1.13  | 2.24  | 1.34  | 2.09  | 1.19  | 3.11  |
| $\alpha$ -Terpineol        | 0.17  | 17.20 | 0.36  | 0.57  | 0.01  | 0.03  | 0.00  | 0.00  | 0.00  | 0.00  | 0.00  | 0.00  |
| Hexyl butyrate             | -     | 17.30 | 3.75  | 5.88  | 3.25  | 11.07 | 5.41  | 10.75 | 4.52  | 7.03  | 5.18  | 13.55 |
| p-Allylanisole (Estragole) | 0.04  | 17.58 | 0.53  | 0.83  | 0.01  | 0.03  | 0.64  | 1.28  | 0.86  | 1.33  | 1.26  | 3.29  |
| Hexyl 2-methylbutanoate    | -     | 20.20 | 3.60  | 5.63  | 2.09  | 7.13  | 4.06  | 8.06  | 4.21  | 6.54  | 7.51  | 19.67 |
| O-Methylthymol             | 2.95  | 20.45 | 6.87  | 10.77 | 2.82  | 9.61  | 4.38  | 8.71  | 4.79  | 7.43  | 5.28  | 13.81 |
| Unknown                    | 0.10  | 21.20 | 0.24  | 0.37  | 0.09  | 0.32  | 0.01  | 0.03  | 0.12  | 0.18  | 0.27  | 0.70  |
| Thymol                     | 4.12  | 23.61 | 1.93  | 1.21  | 1.80  | 2.45  | 2.29  | 1.82  | 1.88  | 1.17  | 2.70  | 2.82  |
| Carvacrol                  | 41.45 | 24.31 | 12.55 | 19.67 | 12.18 | 41.55 | 14.45 | 28.70 | 14.92 | 23.18 | 20.39 | 53.37 |
| Hexyl hexanoate            | -     | 29.50 | 2.68  | 4.20  | 1.49  | 5.08  | 2.50  | 4.98  | 2.25  | 3.50  | 5.10  | 13.34 |
| $\beta$ -Caryophyllene     | 4.00  | 31.36 | 1.68  | 2.64  | 1.05  | 3.57  | 1.21  | 2.40  | 1.45  | 2.25  | 4.07  | 10.65 |



|                                                                   |      |       |      |       |       |        |      |       |      |      |       |       |
|-------------------------------------------------------------------|------|-------|------|-------|-------|--------|------|-------|------|------|-------|-------|
| $\beta$ -Ocimene                                                  | 0.07 | 33.40 | 0.46 | 0.72  | 0.12  | 0.41   | 0.03 | 0.06  | 0.19 | 0.29 | 0.38  | 0.98  |
| Unknown                                                           | 0.43 | 37.01 | 0.00 | 0.00  | 0.00  | 0.00   | 0.03 | 0.05  | 0.00 | 0.00 | 0.00  | 0.00  |
| $\alpha$ -Farnesene                                               | -    | 37.15 | 6.97 | 10.92 | 4.79  | 16.36  | 6.21 | 12.33 | 6.24 | 9.69 | 15.82 | 41.40 |
| Unknown                                                           | 0.08 | 41.24 | 0.00 | 0.00  | 0.00  | 0.00   | 0.03 | 0.05  | 0.00 | 0.00 | 0.00  | 0.00  |
| 2,2,4-Trimethyl-3-(carboxyisopropyl)pentanoic acid isobutyl ester | -    | 42.64 | 1.89 | 2.97  | 36.73 | 125.30 | 3.52 | 6.99  | 0.78 | 1.21 | 1.36  | 3.55  |
| 2,6,10,14-tetramethyl pentadecane                                 | -    | 44.50 | 0.44 | 0.68  | 0.00  | 0.00   | 3.64 | 7.24  | 0.00 | 0.00 | 0.00  | 0.00  |
| 4-sec-Butyl-2,6-di-tert-butylphenol                               | -    | 44.78 | 0.31 | 0.48  | 2.51  | 8.58   | 0.03 | 0.05  | 0.00 | 0.00 | 0.00  | 0.00  |

**Table S7:** Thyme essential oil composition and volatile organic compounds in the cabinets of fruit treated with thyme essential oil at 1.0 % at 1, 10, 28, 43 and 50 days of storage.

| Thyme EO 1.0 %         |      |                      | Temperature: 1 $\pm$ 1 °C |      |      |      |      |      |       |      | 15 $\pm$ 1 °C |      |
|------------------------|------|----------------------|---------------------------|------|------|------|------|------|-------|------|---------------|------|
| Compound               | %    | Retention time (min) | t1                        |      | t10  |      | t28  |      | t43   |      | t50           |      |
|                        |      |                      | %                         | ppm  | %    | ppm  | %    | ppm  | %     | ppm  | %             | ppm  |
| Unknown                | 0.08 | 5.25                 | 0.00                      | 0.00 | 0.00 | 0.00 | 0.00 | 0.00 | 0.00  | 0.00 | 0.00          | 0.00 |
| $\alpha$ -Thujene      | 0.85 | 5.35                 | 0.00                      | 0.00 | 0.00 | 0.00 | 0.00 | 0.00 | 0.00  | 0.00 | 0.00          | 0.00 |
| $\alpha$ -Pinene       | 1.22 | 5.54                 | 0.00                      | 0.00 | 0.00 | 0.00 | 0.00 | 0.00 | 0.00  | 0.00 | 0.00          | 0.00 |
| Camphene               | 1.40 | 6.01                 | 0.00                      | 0.00 | 0.00 | 0.00 | 0.00 | 0.00 | 0.00  | 0.00 | 0.00          | 0.00 |
| $\beta$ -Pinene        | 0.61 | 6.89                 | 0.00                      | 0.00 | 0.00 | 0.00 | 0.00 | 0.00 | 0.00  | 0.00 | 0.00          | 0.00 |
| 3-Octanone             | 0.14 | 7.15                 | 0.11                      | 0.08 | 0.20 | 0.13 | 0.09 | 0.09 | 0.48  | 0.22 | 0.09          | 0.07 |
| $\beta$ -Mircene       | 1.70 | 7.31                 | 0.18                      | 0.12 | 0.29 | 0.19 | 0.24 | 0.26 | 0.81  | 0.37 | 0.74          | 0.53 |
| Unknown                | 0.07 | 7.47                 | 0.24                      | 0.16 | 0.16 | 0.10 | 0.17 | 0.18 | 0.40  | 0.18 | 0.48          | 0.35 |
| $\alpha$ -Phellandrene | 0.24 | 7.87                 | 0.21                      | 0.14 | 0.23 | 0.14 | 0.42 | 0.46 | 0.52  | 0.24 | 0.28          | 0.20 |
| Hexyl acetate          | -    | 8.10                 | 3.82                      | 2.58 | 4.26 | 2.73 | 7.23 | 7.79 | 19.15 | 8.81 | 4.88          | 3.50 |
| 4-Carene               | 0.11 | 8.11                 | 0.00                      | 0.00 | 0.00 | 0.00 | 0.00 | 0.00 | 0.00  | 0.00 | 0.95          | 0.68 |

|                                                                   |       |       |       |       |       |       |       |       |       |      |       |       |
|-------------------------------------------------------------------|-------|-------|-------|-------|-------|-------|-------|-------|-------|------|-------|-------|
| Terpinolene                                                       | 1.48  | 8.36  | 2.10  | 1.42  | 8.10  | 5.20  | 1.22  | 1.31  | 3.30  | 1.52 | 0.78  | 0.56  |
| p-Cymene                                                          | 18.95 | 8.65  | 2.06  | 2.44  | 3.89  | 4.36  | 3.03  | 5.71  | 8.47  | 6.82 | 2.58  | 3.23  |
| Limonene                                                          | 0.88  | 8.83  | 1.19  | 1.01  | 0.59  | 0.47  | 0.30  | 0.40  | 1.70  | 0.98 | 0.58  | 0.52  |
| Eucalyptol                                                        | 0.11  | 8.94  | 0.00  | 0.00  | 0.00  | 0.00  | 0.00  | 0.00  | 0.00  | 0.00 | 0.00  | 0.00  |
| $\gamma$ -Terpinene                                               | 9.91  | 10.20 | 0.00  | 0.00  | 0.00  | 0.00  | 0.00  | 0.00  | 0.20  | 0.09 | 0.09  | 0.07  |
| 3-Carene                                                          | 0.31  | 10.57 | 0.00  | 0.00  | 0.00  | 0.00  | 0.03  | 0.04  | 0.27  | 0.12 | 0.35  | 0.25  |
| Fenchone                                                          | 0.33  | 11.53 | 0.69  | 0.47  | 0.27  | 0.18  | 0.08  | 0.08  | 0.47  | 0.22 | 0.27  | 0.20  |
| Linalool                                                          | 5.73  | 12.23 | 16.31 | 8.27  | 8.42  | 4.05  | 2.98  | 2.41  | 2.82  | 0.97 | 2.52  | 1.35  |
| Unknown                                                           | 0.23  | 12.51 | 0.00  | 0.00  | 0.00  | 0.00  | 0.00  | 0.00  | 1.37  | 0.63 | 0.73  | 0.52  |
| Camphor                                                           | 1.00  | 14.51 | 3.82  | 2.58  | 1.29  | 0.83  | 0.44  | 0.47  | 1.21  | 0.56 | 1.11  | 0.80  |
| Borneol                                                           | 2.37  | 15.79 | 6.66  | 4.50  | 4.86  | 3.12  | 1.78  | 1.92  | 2.91  | 1.34 | 3.30  | 2.36  |
| Terpinen-4-ol                                                     | 1.79  | 16.41 | 3.99  | 2.69  | 2.58  | 1.65  | 0.80  | 0.86  | 1.43  | 0.66 | 1.85  | 1.32  |
| $\alpha$ -Terpineol                                               | 0.38  | 17.20 | 0.78  | 0.53  | 4.28  | 2.75  | 3.01  | 3.25  | 6.33  | 2.91 | 6.98  | 5.00  |
| Hexyl butyrate                                                    | -     | 17.30 | 4.38  | 2.96  | 0.50  | 0.32  | 0.35  | 0.37  | 1.07  | 0.49 | 1.61  | 1.15  |
| Hexyl 2-methylbutanoate                                           | -     | 20.20 | 2.79  | 1.89  | 2.93  | 1.88  | 2.00  | 2.11  | 5.17  | 2.38 | 9.08  | 6.51  |
| O-Methylthymol                                                    | 0.30  | 20.45 | 0.36  | 0.24  | 0.28  | 0.18  | 0.25  | 0.27  | 0.93  | 0.43 | 1.54  | 1.10  |
| Thymol                                                            | 43.26 | 23.61 | 29.15 | 19.70 | 30.48 | 19.56 | 13.21 | 14.25 | 16.54 | 7.61 | 24.92 | 17.86 |
| Carvacrol                                                         | 4.43  | 24.31 | 2.94  | 4.96  | 3.30  | 5.30  | 1.53  | 4.12  | 2.19  | 2.51 | 3.31  | 5.93  |
| Hexyl hexanoate                                                   | -     | 29.50 | 2.86  | 1.93  | 2.80  | 1.80  | 1.65  | 1.78  | 2.93  | 1.35 | 5.45  | 3.91  |
| $\beta$ -Caryophyllene                                            | 2.11  | 31.36 | 0.14  | 0.09  | 0.59  | 0.38  | 0.01  | 0.01  | 1.06  | 0.49 | 1.55  | 1.11  |
| $\alpha$ -Farnesene                                               | -     | 37.15 | 7.48  | 5.05  | 8.27  | 5.31  | 53.63 | 57.85 | 7.66  | 3.52 | 20.21 | 14.48 |
| 2,2,4-Trimethyl-3-(carboxyisopropyl)pentanoic acid isobutyl ester | -     | 42.64 | 5.72  | 3.87  | 7.40  | 4.75  | 1.96  | 2.12  | 5.15  | 2.37 | 1.40  | 1.01  |
| 2,6,10,14-tetramethylpentadecane                                  | -     | 44.50 | 1.31  | 0.88  | 3.33  | 2.14  | 3.41  | 3.68  | 5.33  | 2.45 | 2.35  | 1.69  |
| 4-sec-Butyl-2,6-di-tert-butylphenol                               | -     | 44.78 | 0.73  | 0.49  | 0.70  | 0.45  | 0.21  | 0.23  | 0.13  | 0.06 | 0.00  | 0.00  |

**Table S8:** Lemon essential oil composition and volatile organic compounds in the cabinets of fruit treated with lemon essential oil at 1.0 % at 1, 10, 28, 43 and 50 days of storage.

| Lemon EO 1.0 %                                                    |       |                         | Temperature: 1±1 °C |      |      |      |       |       |       |      | 15±1 °C |       |
|-------------------------------------------------------------------|-------|-------------------------|---------------------|------|------|------|-------|-------|-------|------|---------|-------|
| Compound                                                          | %     | Retention time<br>(min) | t1                  |      | t10  |      | t28   |       | t43   |      | t50     |       |
|                                                                   |       |                         | %                   | ppm  | %    | ppm  | %     | ppm   | %     | ppm  | %       | ppm   |
| α-Thujene                                                         | 0.46  | 5.35                    | 0.00                | 0.00 | 0.00 | 0.00 | 0.00  | 0.00  | 0.00  | 0.00 | 0.00    | 0.00  |
| α-Pinene                                                          | 2.13  | 5.54                    | 0.00                | 0.00 | 0.00 | 0.00 | 0.00  | 0.00  | 0.00  | 0.00 | 0.00    | 0.00  |
| Camphene                                                          | 0.08  | 6.01                    | 0.00                | 0.00 | 0.00 | 0.00 | 0.00  | 0.00  | 0.00  | 0.00 | 0.00    | 0.00  |
| Sabinene                                                          | 2.15  | 6.75                    | 0.00                | 0.00 | 0.00 | 0.00 | 0.00  | 0.00  | 0.24  | 0.04 | 0.42    | 0.16  |
| β-Pinene                                                          | 13.09 | 6.89                    | 0.00                | 0.00 | 0.00 | 0.00 | 0.00  | 0.00  | 0.30  | 0.05 | 0.37    | 0.14  |
| β-Mircene                                                         | 1.61  | 7.31                    | 0.27                | 0.05 | 0.76 | 0.38 | 2.27  | 0.68  | 1.00  | 0.16 | 1.35    | 0.52  |
| Hexyl acetate                                                     | -     | 8.10                    | 12.91               | 2.36 | 9.54 | 4.73 | 30.92 | 9.24  | 20.70 | 3.22 | 3.72    | 1.44  |
| Terpinolene                                                       | 0.09  | 8.36                    | 0.00                | 0.00 | 0.00 | 0.00 | 0.00  | 0.00  | 1.90  | 0.30 | 0.95    | 0.37  |
| p-Cymene                                                          | 1.44  | 8.65                    | 2.93                | 1.25 | 4.25 | 4.93 | 16.92 | 11.83 | 18.51 | 6.91 | 8.06    | 7.28  |
| Limonene                                                          | 66.92 | 8.83                    | 0.00                | 0.00 | 0.00 | 0.00 | 0.00  | 0.00  | 3.18  | 0.85 | 1.64    | 1.06  |
| Eucalyptol                                                        | 0.13  | 8.94                    | 0.00                | 0.00 | 0.00 | 0.00 | 2.13  | 0.64  | 0.00  | 0.00 | 0.14    | 0.05  |
| α-Fenchene                                                        | 0.12  | 9.66                    | 0.00                | 0.00 | 0.00 | 0.00 | 0.40  | 0.12  | 0.00  | 0.00 | 0.22    | 0.09  |
| γ-Terpinene                                                       | 8.84  | 10.20                   | 0.00                | 0.00 | 1.41 | 0.70 | 0.48  | 0.14  | 0.00  | 0.00 | 0.38    | 0.15  |
| Fenchone                                                          | 0.30  | 11.53                   | 0.00                | 0.00 | 0.18 | 0.09 | 0.36  | 0.11  | 0.00  | 0.00 | 0.41    | 0.16  |
| Linalool                                                          | 0.15  | 12.23                   | 14.52               | 2.66 | 2.84 | 1.41 | 4.05  | 1.21  | 1.21  | 0.19 | 2.19    | 0.85  |
| α-Terpineol                                                       | 0.14  | 17.20                   | 2.35                | 0.43 | 0.25 | 0.12 | 1.10  | 0.33  | 1.65  | 0.26 | 1.61    | 0.62  |
| Hexyl butyrate                                                    | -     | 17.30                   | 9.88                | 1.81 | 2.27 | 1.13 | 6.41  | 1.91  | 7.35  | 1.14 | 6.77    | 2.63  |
| Hexyl 2-methylbutanoate                                           | -     | 20.20                   | 15.47               | 2.83 | 3.70 | 1.84 | 6.98  | 2.08  | 9.55  | 1.49 | 15.90   | 6.17  |
| Citral                                                            | 1.57  | 20.28 + 22.13           | 0.25                | 0.04 | 0.08 | 0.04 | 0.10  | 0.03  | 0.11  | 0.02 | 0.06    | 0.02  |
| α-Cubebene                                                        | 0.40  | 28.64                   | 0.00                | 0.00 | 0.76 | 0.37 | 0.47  | 0.14  | 0.00  | 0.00 | 0.00    | 0.00  |
| Hexyl hexanoate                                                   | -     | 29.50                   | 10.66               | 1.95 | 2.52 | 1.25 | 4.09  | 1.22  | 4.19  | 0.65 | 10.42   | 4.04  |
| α-Farnesene                                                       | 0.37  | 37.15                   | 20.43               | 3.73 | 5.64 | 2.80 | 9.31  | 2.78  | 10.21 | 1.59 | 36.64   | 14.22 |
| 2,2,4-Trimethyl-3-(carboxyisopropyl)pentanoic acid isobutyl ester | -     | 42.64                   | 5.02                | 0.92 | 7.41 | 3.68 | 4.64  | 1.39  | 5.08  | 0.79 | 5.50    | 2.14  |

|                                         |   |       |      |      |       |       |      |      |       |      |      |      |
|-----------------------------------------|---|-------|------|------|-------|-------|------|------|-------|------|------|------|
| 2,6,10,14-tetramethyl<br>pentadecane    | - | 44.50 | 4.08 | 0.75 | 53.03 | 26.33 | 9.37 | 2.80 | 14.81 | 2.31 | 3.25 | 1.26 |
| 4-sec-Butyl-2,6-di-tert-<br>butylphenol | - | 44.78 | 1.22 | 0.22 | 5.37  | 2.67  | 0.00 | 0.00 | 0.00  | 0.00 | 0.00 | 0.00 |

**Table S9:** Fennel essential oil composition and volatile organic compounds in the cabinets of fruit treated with fennel essential oil at 1.0 % at 1, 10, 28, 43 and 50 days of storage.

| Fennel EO 1.0 % |       |                         | Temperature: 1±1 °C |      |      |       |       |       |       |      | 15±1 °C |      |
|-----------------|-------|-------------------------|---------------------|------|------|-------|-------|-------|-------|------|---------|------|
| Compound        | %     | Retention time<br>(min) | t1                  |      | t10  |       | t28   |       | t43   |      | t50     |      |
|                 |       |                         | %                   | ppm  | %    | ppm   | %     | ppm   | %     | ppm  | %       | ppm  |
| α-Thujene       | 0.08  | 5.35                    | 0.00                | 0.00 | 0.00 | 0.00  | 0.00  | 0.00  | 0.00  | 0.00 | 0.00    | 0.00 |
| α-Pinene        | 14.41 | 5.54                    | 0.00                | 0.00 | 0.00 | 0.00  | 0.00  | 0.00  | 0.00  | 0.00 | 0.00    | 0.00 |
| Camphene        | 0.27  | 6.01                    | 0.00                | 0.00 | 0.00 | 0.00  | 0.00  | 0.00  | 0.00  | 0.00 | 0.00    | 0.00 |
| Sabinene        | 0.27  | 6.75                    | 0.00                | 0.00 | 0.00 | 0.00  | 0.00  | 0.00  | 0.00  | 0.00 | 0.00    | 0.00 |
| β-Pinene        | 1.17  | 6.89                    | 0.00                | 0.00 | 0.00 | 0.00  | 0.00  | 0.00  | 0.00  | 0.00 | 0.00    | 0.00 |
| β-Mircene       | 1.21  | 7.31                    | 1.06                | 0.71 | 1.00 | 1.73  | 0.94  | 0.93  | 0.93  | 0.55 | 1.01    | 0.97 |
| α-Phellandrene  | 6.28  | 7.87                    | 0.87                | 0.58 | 0.55 | 0.94  | 0.93  | 0.91  | 3.82  | 2.27 | 1.22    | 1.17 |
| Hexyl acetate   | -     | 8.10                    | 11.18               | 7.46 | 8.28 | 14.31 | 16.91 | 16.60 | 14.53 | 8.66 | 2.02    | 1.94 |
| p-Cymene        | 1.53  | 8.65                    | 1.53                | 1.02 | 0.75 | 1.29  | 1.83  | 1.79  | 0.72  | 0.43 | 0.61    | 0.59 |
| Limonene        | 2.72  | 8.83                    | 0.00                | 0.00 | 0.47 | 0.51  | 0.00  | 0.00  | 0.00  | 0.00 | 0.00    | 0.00 |
| Eucalyptol      | 0.11  | 8.94                    | 0.00                | 0.00 | 0.00 | 0.00  | 0.00  | 0.00  | 0.00  | 0.00 | 0.00    | 0.00 |
| Unknown         | 0.22  | 9.20                    | 0.10                | 0.07 | 0.11 | 0.20  | 0.31  | 0.30  | 0.28  | 0.17 | 0.00    | 0.00 |
| γ-Terpinene     | 0.69  | 10.20                   | 0.00                | 0.00 | 0.00 | 0.00  | 0.00  | 0.00  | 0.00  | 0.00 | 0.00    | 0.00 |
| 3-Carene        | 0.07  | 10.57                   | 0.00                | 0.00 | 0.00 | 0.00  | 0.00  | 0.00  | 0.00  | 0.00 | 0.00    | 0.00 |
| Fenchone        | 16.96 | 11.53                   | 7.20                | 4.80 | 1.68 | 2.90  | 3.43  | 3.37  | 3.81  | 2.27 | 3.30    | 3.17 |
| Linalool        | 0.16  | 12.23                   | 6.77                | 1.69 | 0.89 | 0.58  | 2.33  | 0.86  | 1.15  | 0.26 | 0.82    | 0.30 |
| Camphor         | 0.33  | 14.51                   | 0.71                | 0.47 | 0.00 | 0.00  | 0.40  | 0.39  | 0.37  | 0.22 | 0.19    | 0.18 |
| Hexyl butyrate  | -     | 17.30                   | 7.22                | 4.82 | 4.31 | 7.45  | 8.21  | 8.06  | 7.11  | 4.23 | 4.89    | 4.70 |

|                                                                   |       |       |       |       |       |       |       |       |       |       |       |       |
|-------------------------------------------------------------------|-------|-------|-------|-------|-------|-------|-------|-------|-------|-------|-------|-------|
| p-Allylanisole (Estragole)                                        | 1.84  | 17.58 | 1.74  | 1.16  | 0.80  | 1.38  | 1.84  | 1.81  | 2.12  | 1.26  | 2.12  | 2.03  |
| Umbellulol                                                        | 0.21  | 17.81 | 0.91  | 0.61  | 0.34  | 0.59  | 0.65  | 0.64  | 1.01  | 0.60  | 0.61  | 0.59  |
| Hexyl 2-methylbutanoate                                           | -     | 20.20 | 8.55  | 5.70  | 3.59  | 6.20  | 9.15  | 8.98  | 9.12  | 5.43  | 12.57 | 12.08 |
| p-Anisaldehyde                                                    | 0.80  | 20.93 | 1.21  | 0.81  | 0.31  | 0.54  | 0.33  | 0.32  | 0.25  | 0.15  | 0.06  | 0.06  |
| trans-Anethole                                                    | 50.45 | 23.01 | 26.67 | 17.79 | 9.07  | 15.68 | 15.20 | 14.92 | 16.32 | 9.72  | 23.31 | 22.41 |
| Isothujol                                                         | 0.24  | 24.86 | 0.00  | 0.00  | 0.00  | 0.00  | 0.00  | 0.00  | 0.00  | 0.00  | 0.00  | 0.00  |
| Hexyl hexanoate                                                   | -     | 29.50 | 4.63  | 3.09  | 1.76  | 3.04  | 6.59  | 6.46  | 5.12  | 3.05  | 5.45  | 5.24  |
| $\alpha$ -Farnesene                                               | -     | 37.15 | 13.69 | 9.13  | 6.11  | 10.57 | 18.17 | 17.83 | 17.17 | 10.23 | 36.55 | 35.14 |
| 2,2,4-Trimethyl-3-(carboxyisopropyl)pentanoic acid isobutyl ester | -     | 42.64 | 3.09  | 2.06  | 3.53  | 6.11  | 2.78  | 2.73  | 8.39  | 5.00  | 2.34  | 2.25  |
| 2,6,10,14-tetramethyl pentadecane                                 | -     | 44.50 | 2.51  | 1.67  | 51.79 | 89.53 | 9.42  | 9.25  | 7.79  | 4.64  | 2.93  | 2.82  |
| 4-sec-Butyl-2,6-di-tert-butylphenol                               | -     | 44.78 | 0.36  | 0.24  | 4.65  | 8.04  | 0.59  | 0.58  | 0.00  | 0.00  | 0.00  | 0.00  |

**Table S10:** Rot incidence on ‘Opal’ apples treated with essential oils by biofumigation after 60 days of storage at  $1\pm1$  °C and 95% relative humidity and after 14 days of shelf life at  $15\pm1$  °C.

| <b>Treatments</b>  | <b>Rot incidence (%) <math>\pm</math> SD*</b> |                              |
|--------------------|-----------------------------------------------|------------------------------|
|                    | <b>60 days of storage</b>                     | <b>14 days of shelf life</b> |
| Control            | $1 \pm 0.02$                                  | $9 \pm 0.09$                 |
| Pyrimethanil       | $3 \pm 0.02$                                  | $31 \pm 0.01$                |
| Inoculated control | $5 \pm 0.03$                                  | $41 \pm 0.15$                |
| Lemon 1.0 %        | $3 \pm 0.02$                                  | $15 \pm 0.11$                |
| Thyme 1.0 %        | $3 \pm 0.01$                                  | $31 \pm 0.12$                |
| Savoury 1.0 %      | $3 \pm 0.01$                                  | $32 \pm 0.09$                |
| Fennel 1.0 %       | $6 \pm 0.01$                                  | $43 \pm 0.04$                |
| Basil 1.0 %        | $7 \pm 0.05$                                  | $29 \pm 0.09$                |
| Oregano 1.0 %      | $1 \pm 0.01$                                  | $17 \pm 0.05$                |

\* Values are expressed as a mean of three replicates with 4 fruits  $\pm$  standard deviation (SD).
